# Supplementary material for: Towards improved butanol production through targeted genetic modification of Clostridium pasteurianum
Source: PubMed Central journal article supplement (PMC5367854; doi:10.1016/j.ymben.2017.01.009), 2017-03
Supplement: mmc1.pdf [file mmc1.pdf]

# SUPPLEMENTARY INFORMATION

## **Towards improved butanol production through targeted genetic modification of *Clostridium pasteurianum***

Katrin M. Schwarz<sup>a1</sup>, Alexander Grosse-Honebrink<sup>a1</sup>, Kamila Derecka<sup>a</sup>, Carlo Rotta<sup>a</sup>, Ying Zhang<sup>a</sup>, Nigel P. Minton<sup>a2</sup>

<sup>a</sup>*Clostridia Research Group, BBSRC/EPSRC Synthetic Biology Research Centre (SBRC), University of Nottingham, University Park, Nottingham NG7 2RD, UK.*

<sup>1</sup> these authors contributed equally to the work

<sup>2</sup>corresponding author: mrznpm@exmail.nottingham.ac.uk

### **Materials and Methods**

#### **Electroporation of *C. pasteurianum***

Briefly, 20 ml of 2x YTG broth were inoculated with cells from a well grown overnight culture (OD<sub>600</sub> of 0.8 to 1.2) to a final OD<sub>600</sub> of 0.05 and incubated for 3 to 4 h until an OD<sub>600</sub> of 0.6 to 0.8 was reached. Cells were centrifuged (10 min, 8,500 x g, 4°C), re-suspended in 5 ml ice cold SMP buffer (270 mM sucrose, 1 mM MgCl<sub>2</sub>, 5 mM sodium phosphate [pH 6.5]), centrifuged (10 min, 8,500 x g, 4°C) another time and re-suspended in 600 µl ice cold SMP buffer. Of the 600-µl cell suspension 580 µl were transferred into a pre-chilled 0.4 cm electroporation cuvette (Sigma-Aldrich, Dorset, UK) containing 30 µl of 96% (v/v) pure non-denatured ethanol and 0.5 to 5 µg of methylated plasmid DNA. The cell-ethanol-plasmid suspension was incubated for 5 min on ice and, subsequently, electroporated using a Gene Pulser Xcell™ electroporation system (Bio-Rad, Hemel Hempstead, UK), a voltage of 1.8 kV, a capacitance of 25 µF and a resistance of ∞ Ω generating a time constant of 10–18 ms. Immediately after the pulse cells were transferred into pre-warmed 2x YTG broth supplemented with 40 µg/ml uracil, if required, and recovered for 6 to 16 h. Following, cells were centrifuged (10 min, 8,500 x g, RT), re-suspended in 250 µl PBS and plated on RCM agar plates containing the appropriate antibiotic selection (Table 1). Transformants typically took 16 to 24 h (replicative, non-integrative plasmids) or 48 h (ACE, AE) to appear. If transformation efficiencies were to be determined, 100 µl of the 250-µl re-suspension were serially diluted in a total of 1,000 µl PBS of which 100 µl were plated. Colonies were enumerated after a 24-h incubation. All centrifugation steps and washes were carried out anaerobically at 4°C or on ice. If needed, competent cells were frozen until further use. Therefore, cell pellets were re-suspended in 540 µl SMP buffer, supplemented with 60 µl DMSO (10% [v/v]) and frozen at -80 °C.

#### **Segregational stability assay**

The segregational stability of the modular plasmids pMTL82151, pMTL83151, pMTL84151 and pMTL85151 was determined as described previously (Heap et al., 2009). Briefly, per modular vector two CRG4111 transformants verified to carry the respective shuttle plasmid,

were inoculated from RCM<sub>Tm15</sub> plates into 1 ml 2x YTG<sub>Tm15</sub> broth, grown for 12 h and used to re-inoculate another 1 ml 2x YTG<sub>Tm15</sub> broth with 1% (v/v) inoculum. The fresh culture was incubated for another 12 h before it was washed three times with PBS, re-suspended in 1 ml PBS and used to inoculate 1 ml of un-supplemented 2x YTG broth at a 1% (v/v) inoculum to start the segregational stability assay. For the assay, the plasmid harbouring cells were sub-cultured every 12 h in un-supplemented 2x YTG broth using a 1% (v/v) inoculum of the preceding culture. Every 24 h twice 100 µl of the well growing culture were serially diluted in PBS until 10<sup>-8</sup>. Of each dilution 10 µl were spotted twice onto RCM and RCM<sub>Tm15</sub> agar plates and incubated for 24 h before CFUs were enumerated. The segregational stability was calculated as percent stability per generation using the formula  $\frac{1}{n}\sqrt[n]{R}$ . Thereby, R represents the portion of cells which still contain the plasmid at the last time point of the experiment, n the number of generations at this time point grown without selection.

### Construction of the ACE vectors

ACE *pyrE* KO pMTL-KS01: To generate ACE *pyrE* truncation plasmids on the basis of pMTL-JH12 (Heap et al., 2012) an internal 300-bp fragment of the *C. pasteurianum pyrE* gene (CLPA c2685, Poehlein et al., 2015) lacking the first 34 nt and an 1,200-bp sequence immediately downstream of the *pyrE* gene were PCR-amplified from genomic DNA (Table 1) DNA using the oligonucleotides KS001\_SHA12\_Fw and KS001\_SHA12\_Rev or KS002\_LHA\_Fw and KS002\_LHA\_Rev (Table S1). The 5' *SbfI* and 3' *NotI* restriction sites added to the shorter left homology arm (LHA, 300 bp) and the 5' *NheI* and 3' *AscI* restriction sites added to the longer right homology arm (RHA, 1,200 bp) were used to clone the PCR fragments into plasmid pMTL85151 between the *SbfI* and *AscI* restriction sites. The resultant plasmid was designated pMTL-KS01, the *pyrE* KO ACE vector (Table 1).

The *pyrE* ACE complementation vector, pMTL-KS12: A transcriptional terminator sequence (that of the *C. tetani* E88 glutamyl-tRNA synthetase gene, T<sub>Ctet gluRS</sub>) was inserted proximal to the LHA, through its synthesis as a 77-bp *SbfI* DNA fragment and insertion into the unique *SbfI* site of pMTL-KS01 to yield plasmid pMTL-KS02. A Quik Change II Site-Directed Mutagenesis Kit (Agilent Technologies, Stockport, UK) and the oligonucleotides QE\_T1Sbf\_Fw and QE\_T1Sbf\_Rev (Table S1) was then used to silence the *SbfI* recognition site located upstream of T<sub>Ctet gluRS</sub> resulting in the plasmid pMTL-KS03 (Table 1). As the 42-bp *C. pasteurianum* ferredoxin terminator (T<sub>Cpa fdx</sub>, Table 1) of plasmid pMTL85151 was lost during the insertion of the RHA, steps were taken to restore its presence. This was accomplished by synthesising a contiguous *NheI/AscI* fragment comprising the LHA and T<sub>Cpa fdx</sub> and inserting it between the *NheI* and *AscI* sites of pMTL-KS03 to generate pMTL-KS04 (Table 1). To enable an easy replacement of the RHA without the loss of the T<sub>Cpa fdx</sub>, an *AsiSI* recognition site was introduced between the LHA of pMTL-KS04 and the T<sub>Cpa fdx</sub> and the by site-directed mutagenesis and the use of the oligonucleotides QE\_AsiSI add\_Fw and QE\_AsiSI add\_Rev (Table S1). The generated plasmid was named pMTL-KS10 (Table 1).

To make the *pyrE* repair vector pMTL-KS12, a 548-bp fragment of *pyrE* representing the LHA and lacking only the first 34 nt of *pyrE* is to be swapped with the 300bp LHA fragment of pMTL-KS10. oligonucleotides KS001\_SHA12\_Fw and KS001\_SHA14\_Rev were used to PCR amplified the desired DNA fragment from genomic DNA. These oligonucleotides added 5' a *SbfI* and 3' a *NotI* recognition site to the final PCR product. Following, the modified *SbfI* and *NotI* equipped PCR fragment was cloned into appropriately digested pMTL-KS10. The result plasmid is pMTL-KS12. The only difference between pMTL-KS10 and pMTL-KS12 is the LHA it carries.

## Construction of the Allelic Exchange KO plasmids

Typically, target specific AE cassettes were cloned into pMTL-KS15 using *SbfI* and *NheI*. To enable an alternative cloning strategy in case the AE cassette contains the relative abundant 6-bp *NheI* recognition site, an 8-bp *AsiSI* recognition site was introduced between the *NheI* recognition site and the terminator  $T_{Cpa\ fdx}$  employing the oligonucleotides QE\_AsiSIintro\_AA\_Fw and QE\_AsiSIintro\_AA\_Rev (Table S1) and the Quik Change II Site-Directed Mutagenesis Kit (Agilent Technologies, Stockport, UK) according to the manufacturer's recommendations. The resulting plasmid was called pMTL-KS16 (Table 1). For both, pMTL-KS15 as well as pMTL-KS16, the insertion of the AE cassette by *SbfI* and *NheI* or *SbfI* and *AsiSI* lead to a removal of the gratuitous 300-bp *pyrE* SHA-*lacZ* $\alpha$  ORF/MCS-‘cargo’ sequence origination from the plasmid pMTL85151- $T_{Ctet\ gluRS}$ -SHA.

AE cassettes for the markerless and in-frame deletion of genes were generated by SOE PCR using the BIO-X-ACTTM Short Mix according to the manufacturer's recommendation (Bioline Reagents, London, UK). A 700-bp region immediately upstream and downstream of the gene of interest including its start and stop codon were amplified employing genomic DNA and target specific oligonucleotide pairs, Fw1 and Rev1 for the amplification of the upstream region and Fw2 and Rev1 for the amplification of the downstream region. Typically oligonucleotides Rev1 and Fw1 are characterised by a 25- to 35-bp long overlapping complementary sequence enabling the later fusion of the two PCR fragments in a third PCR reaction. Oligonucleotides Fw1 and Rev2 equipped the particular PCR fragment with a 5' *SbfI* and a 3' *NheI* restriction site. Following the generation of the two separate PCR fragments, self-same were gel purified and used in equimolar amounts in a third PCR reaction employing the oligonucleotides Fw1 and Rev2. The final PCR product was digested using *SbfI* and *NheI*, purified and cloned into the equally treated AE plasmid pMTL-KS15 resulting in a target specific AE vector. All generated AE plasmids were confirmed by analytic restriction digest and Sanger sequencing.

For the generation of the *spo0A* KO cassette the oligonucleotides KS013\_spo0A\_Fw1 and KS013\_spo0A\_Rev1 and KS013\_spo0A\_Fw2 and KS013\_spo0A\_Rev2 were employed (Table S1). The final AE vector was called pMTL-KS15::spo0A (Table 1).

For the generation of the *hdyA* KO cassette the oligonucleotides KS014\_hyd\_Fw1 and KS014\_hyd\_Rev1 and KS014\_hyd\_Fw2 and KS014\_hyd\_Rev2 were employed (Table S1). The final AE vector was called pMTL-KS15::hdyA (Table 1).

For the generation of the *rex* KO cassette the oligonucleotides KS015\_rex\_Fw1 and KS015\_rex\_Rev1 and KS015\_rex\_Fw2 and KS015\_rex\_Rev2 were employed (Table S1). The final AE vector was called pMTL-KS15::hdyA (Table 1).

For the generation of the *dhaBCE* KO cassette the oligonucleotides KS016\_dhaBCE\_Fw1 and KS016\_dhaBCE\_Rev1 and KS016\_dhaBCE\_Fw2 and KS016\_dhaBCE\_Rev2 were employed (Table S1). The final AE vector was called pMTL-KS15::dhaBCE (Table 1).

## Complementation plasmid

To verify the observed phenotype of formerly generated KO strains, self-same strains were *in trans* complemented employing ACE and the genomic *pyrE* locus. Typically plasmids for the integration of the homologous and heterologous DNA were constructed as described below. First, the open reading frame encoding the target gene was amplified from genomic DNA using

BIO-X-ACT™ Short Mix (Bioline Reagents, London, UK) and gene specific primers which added a 5' *NotI* and a 3' *NheI* recognition site to the PCR fragment. *NotI* and *NheI* were used to clone the PCR fragment into the equally digested ACE plasmid. Generally pMTL-KS12 (Table 1) was employed. All generated complementation vectors were verified by a diagnostic restriction digest and Sanger sequencing. The homologous or heterologous genes was cloned either with its own promoter or with a heterologous promoter inserted into the plasmid pMTL-KS12 by *NotI* and *NdeI* restriction digest.

For the specific task of generating a *spo0A* complementation vector, the indigenous *C. pasteurianum spo0A* gene (CLPA c19180, Poehlein et al., 2015) as well as a 267-bp sequence immediately upstream of the *spo0A* start codon predicted to comprise the promoter region of *spo0A* (SoftBerry BPROM software, Solovyev and Salamov, 2011) were amplified from genomic DNA using the oligonucleotides KS004\_spo0A\_compl\_Fw and KS004\_spo0A\_compl\_Rev (Table S1). Subsequently, the 1095-bp fragment was cloned into pMTL-KS12 and confirmed as described above. The complementation plasmid pMTL-KS12::*spo0A* was used to generate the *C. pasteurianum spo0A* complementation (repair) strain CRG5518 as described in Methods.

The *rex* complementation vector pMTL-KS12::*rex* was constructed by amplifying a 816-bp fragment with primers KS010\_rex\_compl\_Fw/KS010\_rex\_compl\_Rev (Table S1) comprising the 183-bp sequence upstream of *rex* and the *rex* gene from *C. pasteurianum DSM 525* and cloning it into the *NotI/NheI* recognition sites of pMTL-KS12. The plasmid was used to generate strain *C. pasteurianum DSM525-H1::rex\** (CRG5524) (Table 1).

The plasmid for complementation of the hydrogenase *hyd* was constructed by amplifying a 2118-bp fragment comprising the 393-bp sequence upstream of *hyd* and the *hyd* gene with primers KS011\_hyd\_compl\_Fw/ KS011\_hyd\_compl\_Rev (Table S1) which was cloned into the *NotI/NheI* recognition sites of pMTL-KS12 leading to plasmid pMTL-KS12::*hyd*. The plasmid was used to generate strain *C. pasteurianum DSM525-H1::hydA\** (CRG5530) (Table 1).

Finally, the *dhaBCE* complementation plasmid *C. pasteurianum DSM525-H1::dhaBCE\** was constructed by amplifying a 2984-bp fragment comprising the 294-bp sequence upstream of *dhaB* and the *dhaBCE* genes with primers KS012\_dhaBCE\_compl\_Fw/ KS012\_dhaBCE\_compl\_Rev (Table S1) and cloning the *NotI/NheI* recognition sites of pMTL-KS12. The plasmid was used to generate strain *C. pasteurianum DSM525-H1::dhaBCE\** (CRG5536) (Table 1).

## Figures

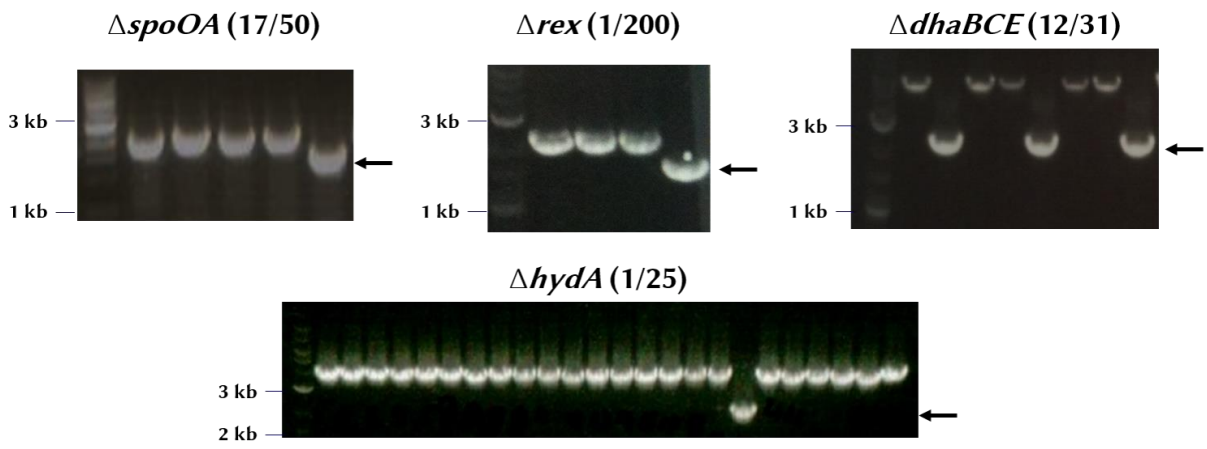

**Fig. S1.** PCR of double-crossovers after allelic exchange knock out of target genes. Ratios of successful knock outs over wild type revertants are given for each target.

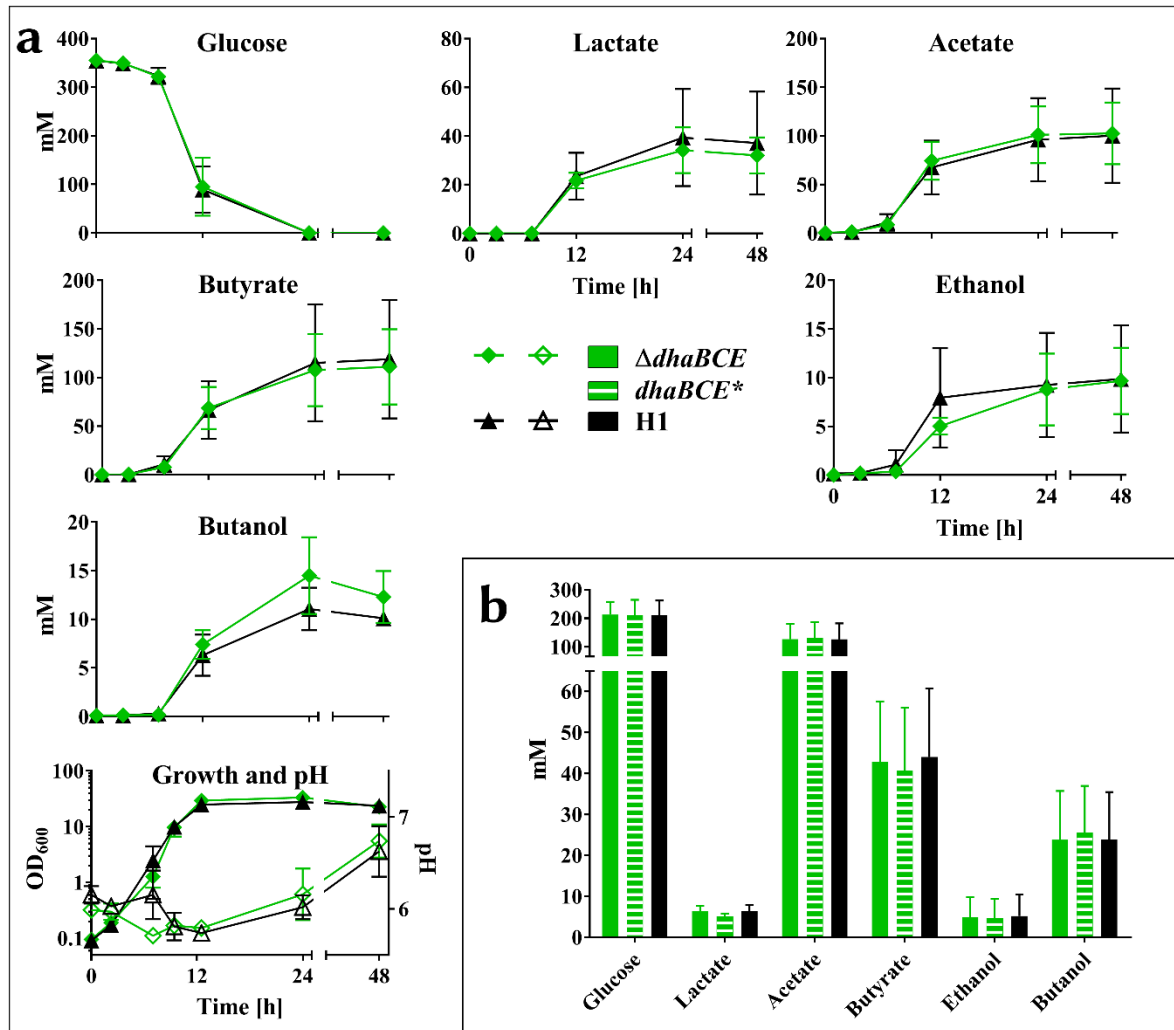

**Fig. S2.** Glucose fermentations of *C. pasteurianum*-H1 (H1), *C. pasteurianum*-H1 $\Delta dhaBCE$  ( $\Delta dhaBCE$ ) and *C. pasteurianum*-H1-*dhaBCE* complementation (*dhaBCE*\*). a) Bioreactor fermentation with 60 g/l glucose in Biebl medium at pH 6 was carried out for 48 h with fermentation being visibly completed after 24 hours. Error-bars indicate range of two fermentations. b) Histogram showing product formation of serum bottle fermentation of deletion strains and complementations. Glucose usage and product formation is shown after 24 h. Error-bars indicate standard error of three replicates.

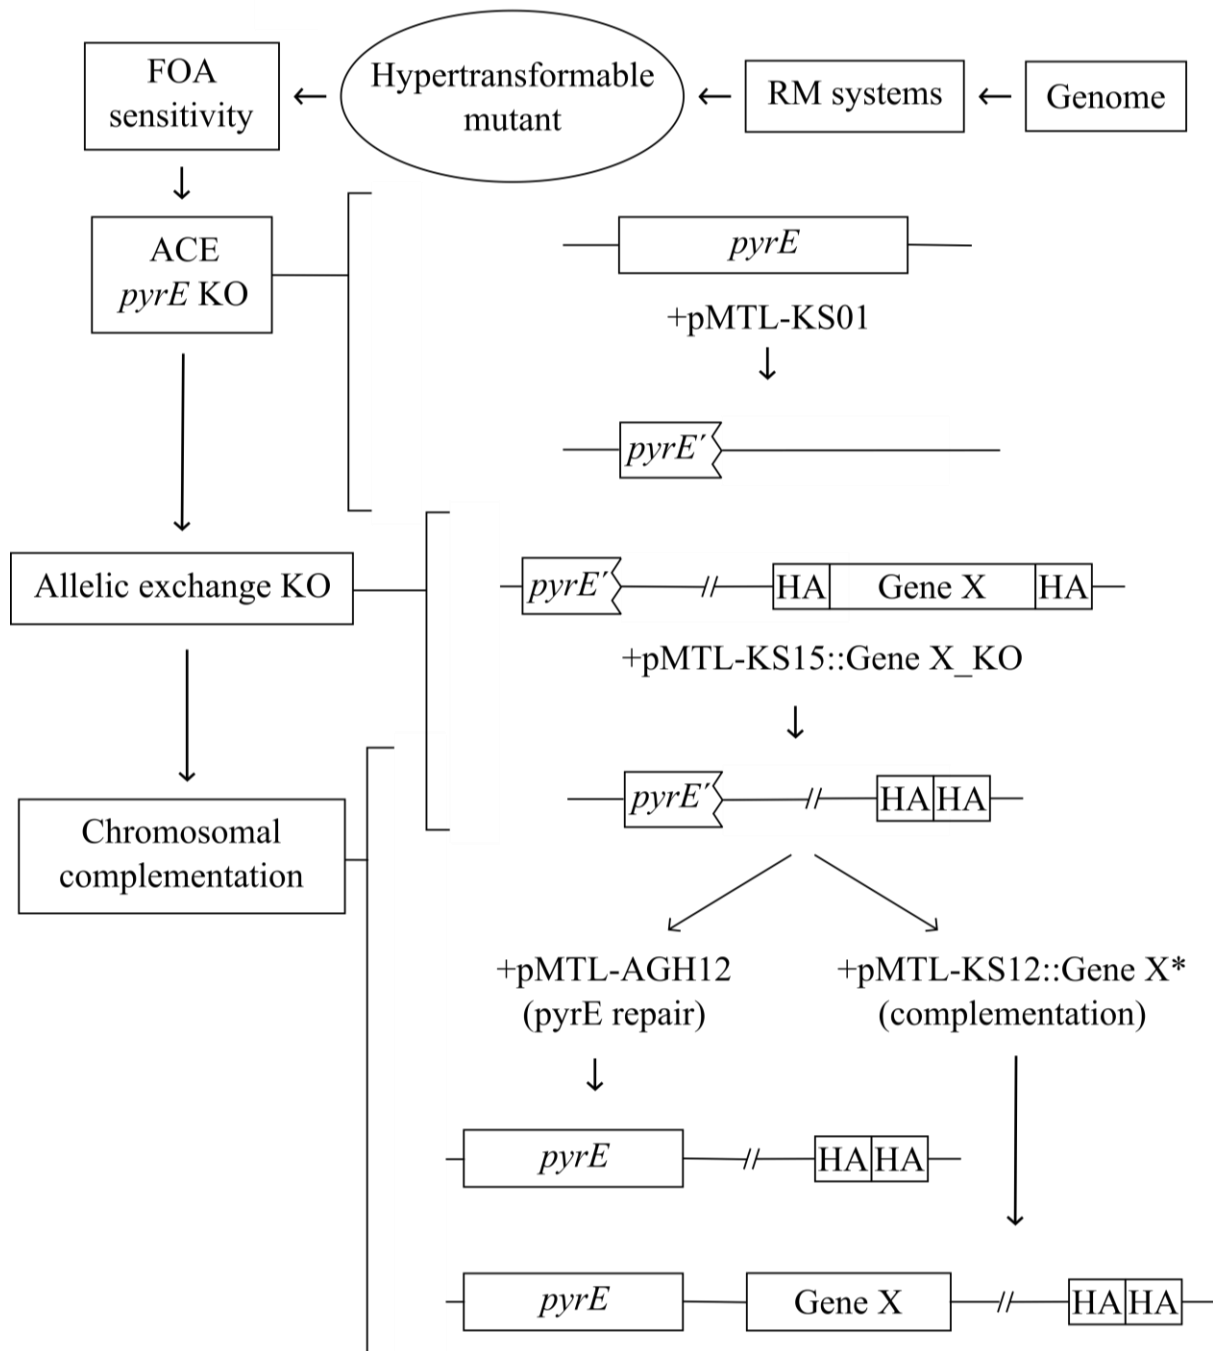

**Fig S3.** The clostridial roadmap implemented in *C. pasteurianum* (Minton et al., 2016). The genome was published by Poehlein et al. (2015) and restriction modification systems were identified. Plasmid DNA was protected against restriction by *in vitro* methylation with *E. coli* carrying plasmid pMTL-CR1 expressing the M.BepI methylase. Due to low transformation efficiency in the wild type a screen was done for hypertransformable mutants (not in the original roadmap, indicated by oval). 5-fluorouracil (FOA) sensitivity was assayed based on which a *pyrE* truncation strain (*pyrE'*) was produced with the ACE plasmid pMTL-KS01. This strain allowed the use of allelic exchange technology to make knock-outs of genes of interest (Gene X) guided by homology arms (HAs) up- and downstream of the gene. Knock-out mutants were complemented at the *pyrE* locus by repairing the *pyrE* allele and supplying the gene with its native promoter downstream of *pyrE* using plasmids pMTL-KS12::Gene X\*. The *pyrE* allele was repaired to wild type without additional cargo with plasmid pMTL-AGH12.

## Tables

**Table S1.** Primers used in this study. \*Upper case letters: added restriction endonuclease recognition sites; Italics: 5' overhang complementary sequences in SOE PCR; Underlined: Side-directed mutagenesis sites.

| Name                   | Sequence 5' to 3'*                                                                                         |
|------------------------|------------------------------------------------------------------------------------------------------------|
| <b>PCR</b>             |                                                                                                            |
| KS001_SHA12_Fw         | cccgggCCTGCAGGtaaaagagtcagaggctcttttagaaggacatTTTTTtac                                                     |
| KS001_SHA12_Rev        | cccgggGCGGCCGCccttatctcctTTTTTtaacttcaaactcctctTTTtaatagtc                                                 |
| KS001_SHA14_Rev        | cccgggGCGGCCGCtcaaactatatttctgctgccaggTTTTatgtatggtata                                                     |
| KS002_LHA_Fw           | gCCTAGCtttatcaaatTTTTtagtataattgactTTTttaaacaataattgTTtgatttgtaa<br>ttgTTg                                 |
| KS002_LHA_Rev          | cccgggGCGGCCCaagctactTTTctgctacagagtaagTTTTatagggata                                                       |
| KS003_85151_LHA_Rev2   | gcacccctgaaccccatgct                                                                                       |
| KS004_Cpa_pyrE_gen_Fw  | gttttacatgaaatatttaagaattTTTtgctgctataagc                                                                  |
| KS004_Cpa_pyrE_gen_Rev | catggactacaatagcttcataataaccgcc                                                                            |
| KS005_spo0A_genome_Fw  | ccaataacagatgTTgatactggtacaatgctcag                                                                        |
| KS005_spo0A_genome_Rev | tctagaaaaccatcttccgaaaaagataccaaacatactt                                                                   |
| KS006_rex_genome_Fw    | ggctgtccaaattTTgccttagtagaagctatt                                                                          |
| KS006_rex_genome_Rev   | cccttataagctataagatactgTTcogagccattc                                                                       |
| KS007_hyd_genome_Fw    | gatggactaataatgTTaagctaattgatgatagtattatagatgg                                                             |
| KS007_hyd_genome_Rev   | gcaactgatttcaatattaatgtctcatagtgaaaaatcc                                                                   |
| KS008_bcd_genome_Fw    | gaatggattaaaaaatagTTTgggTggaaaaatagactg                                                                    |
| KS008_bcd_genome_Rev   | gttcttgcaaatatagaaggatcaaaatgctcctc                                                                        |
| KS009_spo0A_compl_Fw   | cccgggGCGGCCGCaataaaagactTTtagagtaaattctaaagtctTTTtataattaatgTTTaaat<br>aaattattatag                       |
| KS009_spo0A_compl_Rev  | cccgggGCTAGCctactgaccacattcttaaccttTTTTtaagtctaag                                                          |
| KS010_rex_compl_Fw     | cccgggGCGGCCGCaatTTaatcaccagcctaataattaagtg                                                                |
| KS010_rex_compl_Rev    | cccgggGCTAGCttatattgtcttattcattaggaagtc                                                                    |
| KS011_hyd_compl_Fw     | cccgggGCGGCCGCgtaaattTTtatttcaatttctatatatgattattaatcctcacaattaat<br>gc                                    |
| KS011_hyd_compl_Rev    | cccgggGCTAGCttattTTTTtatatttaaagtgtaatatttcatgggcacgacc                                                    |
| KS012_dhaBCE_compl_Fw  | cccgggGCGGCCGCtTTTTaaagactaatgctataaaaagtaggcaagataattagaattatttt<br>aattatattg                            |
| KS012_dhaBCE_compl_Rev | cccgggGCTAGCctagtctctattctactttatttctcttactgtatac                                                          |
| AGH0001_pyrE_Fw        | cccgggCCTGCAGGtaaaagagtcagaggctcttttagaaggaca                                                              |
| AGH0002_pyrE_Rev       | cccgggGCGGCCCaagctactTTTctgctacagagtaagTTTTat                                                              |
| <b>SOE-PCR</b>         |                                                                                                            |
| KS013_spo0A_Fw1        | aaaaCCTGCAGGtgtaaatgaaaataatcccatggg                                                                       |
| KS013_spo0A_Rev1       | ccctaaaactactctcaaccacctacattTTTTaactccccTTtatatttctattc                                                   |
| KS013_spo0A_Fw2        | gaatagaaatataaaggggagttataaaaatgtagtggttgagagtagTTTTaggg                                                   |
| KS013_spo0A_Rev2       | aaaaGCTAGCtcaaatcaataaatttacagcagatga                                                                      |
| KS014_hyd_Fw1          | aaaaCCTGCAGGatcaatttaatatcaatgaaaaaataatactattatacttcataaataat<br>agtgg                                    |
| KS014_hyd_Rev1         | <i>cttaaaattaatctaggaggctagatatg</i> taaatttattatttgaaaataaaaaataaaaacagca<br>ttatgaaaatattgTTTTcataatgctg |
| KS014_hyd_Fw2          | <i>gtttttattttttttcaataataaatttac</i> atatctagcctcctagatttaattTTtaagatct<br>ttatttaatttaacagc              |
| KS014_hyd_Rev2         | cccgggGCTAGCataaatatgaataatataatacaagtaaaaggaataacttataaacttaatgat<br>cttatac                              |
| KS015_rex_Fw1          | cccgggCCTGCAGGtttcaagTTTTctgaaacaccttattacctagtattccaaattttc                                               |
| KS015_rex_Rev1         | <i>tttcagaggtaaggggtgcaacagttg</i> taaagatttcacattcatatttaactgctaaaataca<br>aaagctattattataag              |
| KS015_rex_Fw2          | <i>gtattaaatatgaatgtgaaatctttaca</i> actgTTgcaccccttacctctgaaatatat                                        |



|                   |                                                                         |
|-------------------|-------------------------------------------------------------------------|
| KS015_rex_Rev2    | cccgggGCTAGCgatttataatttttatcataattttctgaggaaaatccaagtccatttaaaac       |
| KS016_dhaBCE_Fw1  | cccgggCCTGCAGGgtctgtgatttatcggagattctcagatatacactaa                     |
| KS016_dhaBCE_Rev1 | aatttcataatttccacctgccaactacatatataatcctcctttatcaaatctctgttcttata<br>tc |
| KS016_dhaBCE_Fw2  | agatttgataaaggaggattatataatgtagttggcaggtggaaattatgaaattcgttgct          |
| KS016_dhaBCE_Rev2 | cccgggGCTAGCgcaggtattcttctttctgcacatcacc                                |

---

Side-directed mutagenesis

|                      |                                                                                                      |
|----------------------|------------------------------------------------------------------------------------------------------|
| QE_T1Sbf_Fw          | cgacgagcaaggcaagaccgatcgggcccctcctggctgccaatagataaaaataaagtctgccac                                   |
| QE_T1Sbf_Rev         | gtggcagactttatttttatctattggcagccaggagggggcccgatcggctcttgcttgcctgctcg                                 |
| QE_AsiSI add_Fw      | atgtgcagcttcttatttttatgcgatcgtttatcaaatattttttagtataaattgactttattt<br>aaaacataattgtttgatttgtaattggtg |
| QE_AsiSI add_Rev     | caacaattacaatacaacaattatgttttaataaagtcaattataactaaaaatatttgataaag<br>cgatcgcataaaaaataagaagcctgcaaat |
| QE_AsiSIintro_AA_Fw  | caacagttgcgcagcctgaatggcgaatggcgctagcgcgatcgcataaaaaataagaagcctgcat<br>ttgcaggttcttatt               |
| QE_AsiSIintro_AA_Rev | aataagaagcctgcaaatgcaggttcttatttttatgcgatcgcgctagcgcattcgcattca<br>ggctgcgcaactgttg                  |

---

**Table S2.** Table of putatively Rex regulated genes with target sequence and distance from closest start codon.

| Genome position | Sequence                | Locus tag   | Gene         | Protein function                                                                                                   | ATG-distance | Gene on     |
|-----------------|-------------------------|-------------|--------------|--------------------------------------------------------------------------------------------------------------------|--------------|-------------|
| 185124          | TTGATAAAATTT<br>TTAATAA | CLPA_c01790 | <i>mpg1</i>  | putative mannose-1-phosphate<br>guanyltransferase                                                                  | 84           | complement  |
| 193348          | TTATTATAAAT<br>ATAACAA  | CLPA_c01840 |              | transcriptional regulator                                                                                          | 81           | complement  |
| 442350          | TTGTTATGTAC<br>TTAACAA  | CLPA_c04110 |              | transcriptional regulator, AraC<br>family                                                                          | 119          | same strand |
| 470707          | TTGTTATATTT<br>ATAACAT  | CLPA_c04410 |              | hypothetical protein                                                                                               | 146          | same strand |
| 542964          | TTGTTAAATTTG<br>TTAACAA | CLPA_c05110 |              | iron (metal) dependent repressor,<br>DtxR family                                                                   | 377          | same strand |
| 580610          | TTGTTATATAA<br>ATAACAA  | CLPA_c05450 |              | nitroreductase                                                                                                     | 413          | complement  |
| 617573          | TTGTTAAATAA<br>ATAACAA  | CLPA_c05730 | <i>adhE1</i> | aldehyde-alcohol dehydrogenase                                                                                     | 37           | same strand |
| 946770          | TAGTTAAAAAT<br>TTAACAT  | CLPA_c08620 | <i>thlA1</i> | acetyl-CoA acetyltransferase                                                                                       | 114          | complement  |
| 955099          | TTGTTAATACA<br>CTAACAG  | CLPA_c08710 |              | MarR family transcriptional<br>regulator                                                                           | 15           | same strand |
| 1058613         | TTTTTATTTTA<br>TTGACAA  | CLPA_c09900 |              | nicotinamidase family protein<br>ABC-type Fe <sup>3+</sup> -siderophore<br>transport system, permease<br>component | 74           | same strand |
| 1324031         | TTGATAAAATA<br>CTAACAT  | CLPA_c12290 |              |                                                                                                                    | 99           | same strand |
| 1351981         | TTATTATAAAA<br>TTAACAA  | CLPA_c12470 | <i>cbiM</i>  | cobalt transport protein CbiM                                                                                      | 270          | complement  |
| 1390593         | TTTTTATTATA<br>TTAACAT  | CLPA_c12900 |              | hypothetical protein                                                                                               | 498          | complement  |
| 1393572         | TTATTACAATA<br>TTAACAA  | CLPA_c12920 |              | peptidase family M50                                                                                               | 71           | same strand |
| 1425190         | TTGATAGTGTA<br>TTAAAAA  | CLPA_c13250 | <i>cysE</i>  | serine acetyltransferase                                                                                           | 568          | same strand |
| 1429806         | TTGTTAAAAAT<br>TTGACAA  | CLPA_c13290 |              | hypothetical protein                                                                                               | 86           | same strand |
| 1429918         | TTTTTATATCA<br>ATAACAA  | CLPA_c13300 |              | hypothetical protein UPF0178                                                                                       | 221          | same strand |
| 1615045         | TTATTAGAAAA<br>ATAACAA  | CLPA_c15130 |              | hypothetical protein                                                                                               | 35           | same strand |
| 1617865         | TTGCTAATTAT<br>TTAACAT  | CLPA_c15160 | <i>adhE2</i> | aldehyde-alcohol dehydrogenase                                                                                     | 97           | complement  |
| 1881969         | TTGATAATTAT<br>TTAACAA  | CLPA_c17480 |              | flavodoxin                                                                                                         | 83           | same strand |
| 1952030         | TTATTAAATAA<br>TTGACAA  | CLPA_c18120 | <i>flgB</i>  | flagellar basal body rod protein<br>FlgB                                                                           | 428          | complement  |
| 2225549         | TTGATAAACAA<br>ATAACAT  | CLPA_c20830 | <i>pta</i>   | phosphate acetyltransferase                                                                                        | 256          | same strand |
| 2450806         | TTGATAATATT<br>TTAACAA  | CLPA_c22810 | <i>dhaB</i>  | glycerol dehydratase large<br>subunit                                                                              | 64           | complement  |

|         |                        |             |               |                                                                    |     |             |
|---------|------------------------|-------------|---------------|--------------------------------------------------------------------|-----|-------------|
| 2545028 | TTGATAATTTT<br>TTAACAT | CLPA_c23760 | <i>aldA</i>   | putative aldehyde dehydrogenase<br>AldA                            | 81  | complement  |
| 2563784 | TAGATAATTTT<br>TTAACAA | CLPA_c23901 |               | hypothetical protein                                               | 307 | same strand |
| 2757266 | TTTATACACTC<br>TTAACAA | CLPA_c25790 |               | hypothetical protein                                               | 173 | complement  |
| 2776821 | TTGTTTAAAAA<br>CTAACAA | CLPA_c26000 |               | NifU-like domain containing<br>protein                             | 121 | same strand |
| 2843829 | TTATTATACTA<br>TTAACAT | CLPA_c26620 |               | hypothetical protein                                               | 82  | complement  |
| 2937664 | TTGTTAATATA<br>TTAACAT | CLPA_c27550 |               | LysR family transcriptional<br>regulator                           | 75  | same strand |
| 2984508 | TTATTAATTAA<br>TTAAAAA | CLPA_c27880 |               | putative transketolase N-terminal<br>section                       | 156 | same strand |
| 3015230 | TAGGTAAAGTA<br>TTAACAA | CLPA_c28170 | <i>gpmI</i>   | 2,3-bisphosphoglycerate-<br>independent phosphoglycerate<br>mutase | 162 | same strand |
| 3067448 | TTGTTAGAATA<br>TTAACAA | CLPA_c28630 | <i>crt2</i>   | 3-hydroxybutyryl-CoA<br>dehydratase                                | 27  | same strand |
| 3092582 | TTGATAATATA<br>TTAAAAA | CLPA_c28840 | <i>mtlA</i>   | PTS system mannitol-specific<br>EIICB component                    | 307 | same strand |
| 3106226 | TTGTTTGACAA<br>TTAACAA | CLPA_c28930 | <i>adhE4</i>  | aldehyde-alcohol dehydrogenase                                     | 121 | same strand |
| 3106321 | TAGTTAAATTT<br>TTAACAA | CLPA_c28930 | <i>adhE4</i>  | aldehyde-alcohol dehydrogenase                                     | 216 | same strand |
| 3259481 | TTATTAATGGA<br>TTAACAA | CLPA_c30260 | <i>ssuC1</i>  | putative aliphatic sulfonates<br>transport permease protein SsuC   | 216 | same strand |
| 3612217 | TTTTTAATTCA<br>TTGACAA | CLPA_c33470 |               | hypothetical protein                                               | 365 | same strand |
| 3634909 | TTTTTAAAGGT<br>TTAACAA | CLPA_c33660 | <i>mdeA3</i>  | methionine gamma-lyase                                             | 44  | same strand |
| 3707143 | TTGCTAGTTTA<br>TTAACAT | CLPA_c34300 |               | hypothetical protein                                               | 17  | complement  |
| 3835308 | TTGTTATTTAA<br>TTCACAA | CLPA_c35710 | <i>thlA2</i>  | acetyl-CoA acetyltransferase                                       | 47  | complement  |
| 3846267 | TATTTAAAATA<br>TTAACAA | CLPA_c35810 | <i>spoVD2</i> | stage V sporulation protein D                                      | 207 | same strand |
| 3971344 | TTTTTAGAAAT<br>ATAACAA | CLPA_c37090 |               | hypothetical protein                                               | 34  | same strand |
| 4077063 | TTGCTAATTAA<br>TTAATAA | CLPA_c38200 | <i>nifH6</i>  | nitrogenase iron protein                                           | 813 | same strand |
| 4082067 | TTGTTATTGTA<br>TTAAAAA | CLPA_c38230 | <i>opuCA</i>  | carnitine transport ATP-binding<br>protein OpuCA                   | 111 | same strand |
| 4160172 | TTGCTAAAAAT<br>TTAAAAA | CLPA_c39050 | <i>asd</i>    | aspartate-semialdehyde<br>dehydrogenase                            | 589 | same strand |
| 4166771 | TTATTAATTTA<br>TTAAAAA | CLPA_c39090 |               | NAD(P)H dehydrogenase                                              | 136 | same strand |
| 4264175 | TTGTTAATATA<br>TTTACAA | CLPA_c40020 |               | hypothetical protein                                               | 14  | same strand |

## References

- Heap, J.T., Pennington, O.J., Cartman, S.T. and Minton, N.P., 2009. A modular system for *Clostridium* shuttle plasmids. *Journal of microbiological methods*, 78(1), pp.79-85.
- Heap, J.T., Ehsaan, M., Cooksley, C.M., Ng, Y.K., Cartman, S.T., Winzer, K. and Minton, N.P., 2012. Integration of DNA into bacterial chromosomes from plasmids without a counter-selection marker. *Nucleic acids research*, 40(8), pp.e59-e59.
- Minton, N.P., Ehsaan, M., Humphreys, C.M., Little, G.T., Baker, J., Henstra, A.M., Liew, F., Kelly, M.L., Sheng, L., Schwarz, K. and Zhang, Y., 2016. A roadmap for gene system development in *Clostridium*. *Anaerobe* 41, 104-112.
- Poehlein, A., Grosse-Honebrink, A., Zhang, Y., Minton, N.P. and Daniel, R., 2015. Complete genome sequence of the nitrogen-fixing and solvent-producing *Clostridium pasteurianum* DSM 525. *Genome announcements*, 3(1), pp.e01591-14.
- Solovyev, V. and Salamov, A., 2011. Automatic annotation of microbial genomes and metagenomic sequences. *Metagenomics and its applications in agriculture, biomedicine and environmental studies*, pp.61-78.
